# Supplementary material
Source: PubMed Central journal article supplement (PMC2878328)
Supplement: NIHMS823-supplement-supplement_1.pdf [file NIHMS823-supplement-supplement_1.pdf]

1  
2  
3  
4  
5  
6  
7  
8  
9  
10  
11  
12  
13  
14  
15  
16  
17  
18  
19  
20  
21  
22  
23  
24  
25  
26  
27  
28  
29  
30  
31  
32  
33  
34  
35  
36  
37  
38  
39  
40  
41  
42  
43  
44  
45  
46  
47  
48  
49  
50  
51  
52  
53  
54  
55  
56  
57  
58  
59  
60

**Online Table:** Antepartum CRP, leptin and adiponectin adjusted for weeks gestation at the time of the OGTT. Data are presented as adjusted means followed by standard error in parentheses.

|             | <u>NGT</u>  | <u>GIGT</u> | <u>GDM</u>  | <u>p</u> |
|-------------|-------------|-------------|-------------|----------|
| CRP         | 6.2 [0.43]  | 7.0 [0.74]  | 8.7 [0.60]  | 0.0030   |
| Leptin      | 37.2 [1.50] | 38.9 [2.52] | 41.2 [2.05] | 0.2875   |
| Adiponectin | 8.5 [0.19]  | 7.4 [0.31]  | 7.3 [0.25]  | 0.0002   |

For Peer Review
